# Supplementary material for: Prognostic role of intratumoral IL-17A expression by immunohistochemistry in solid tumors: a meta-analysis
Source: PubMed Central journal article supplement (PMC5630420; doi:10.18632/oncotarget.18807), 2017-06-29
Supplement: oncotarget-08-66382-s001.pdf [file oncotarget-08-66382-s001.pdf]

# Prognostic role of intratumoral IL-17A expression by immunohistochemistry in solid tumors: a meta-analysis

## Supplementary Materials

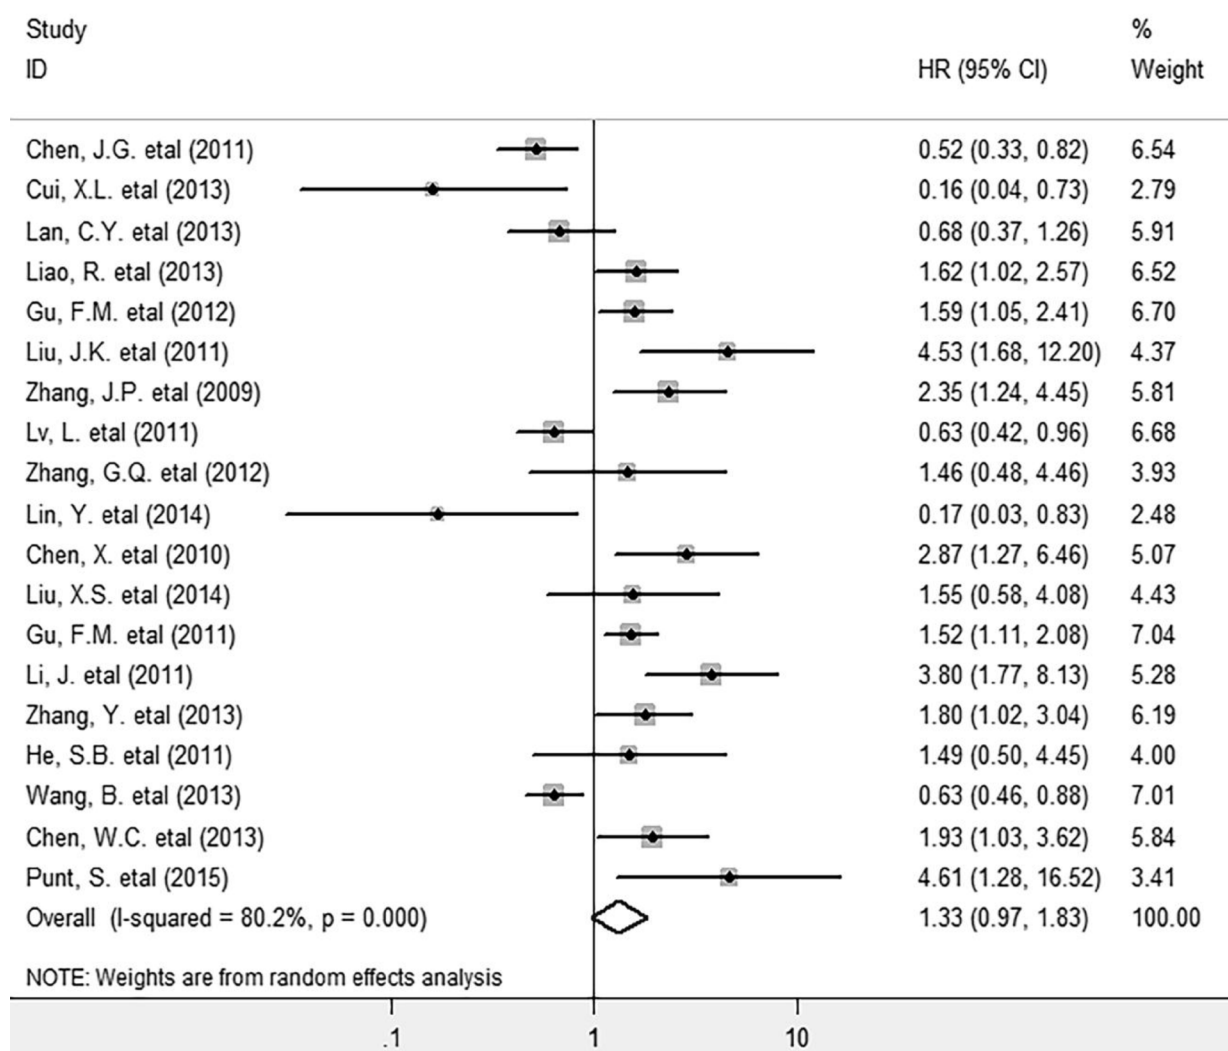

Supplementary Figure 1: Forest plots describing HR of the association between intratumoral IL-17A and OS in solid tumors.

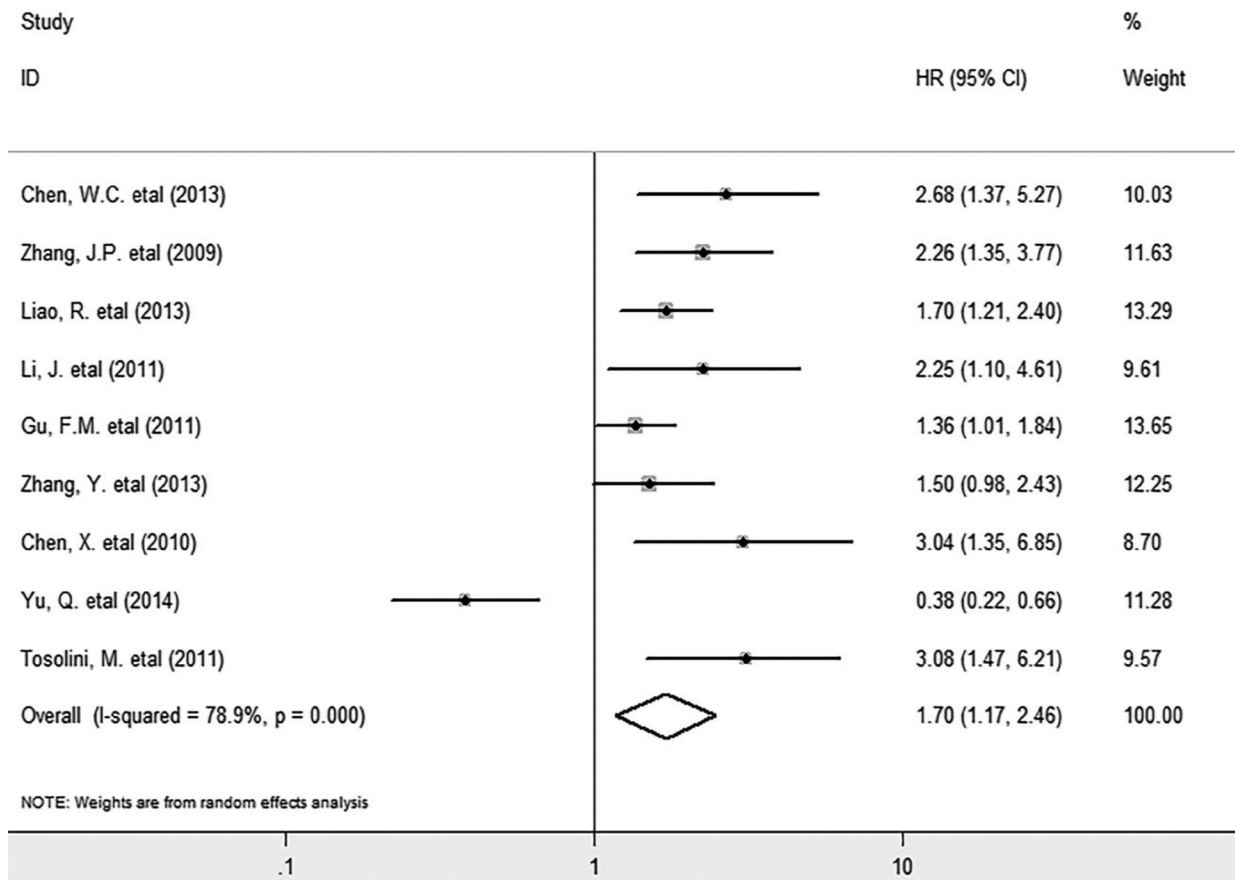

**Supplementary Figure 2: Forest plots describing HR of the association between intratumoral IL-17A and DFS in solid tumors.**

A. 1 - Year OS

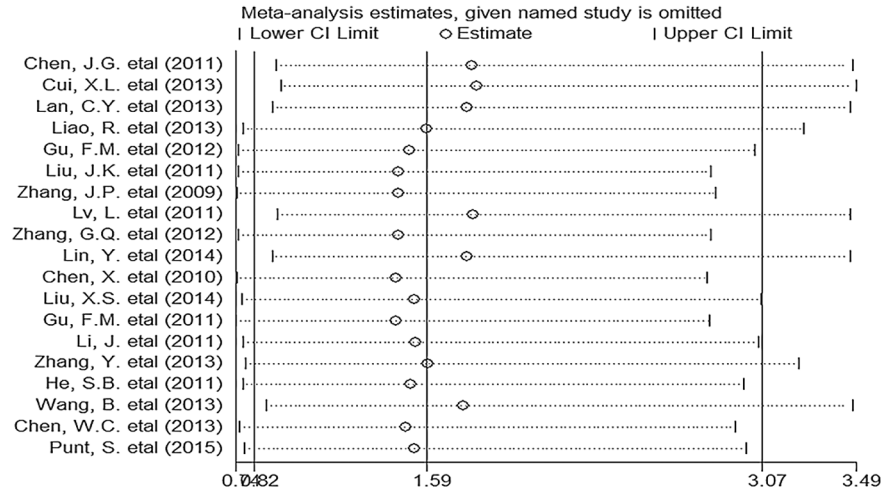

B. 3 - Year OS

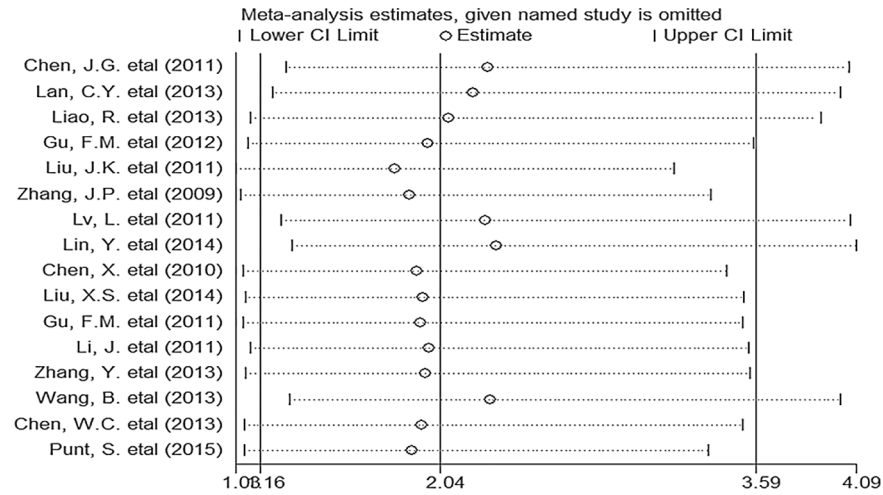

C. 5 - Year OS

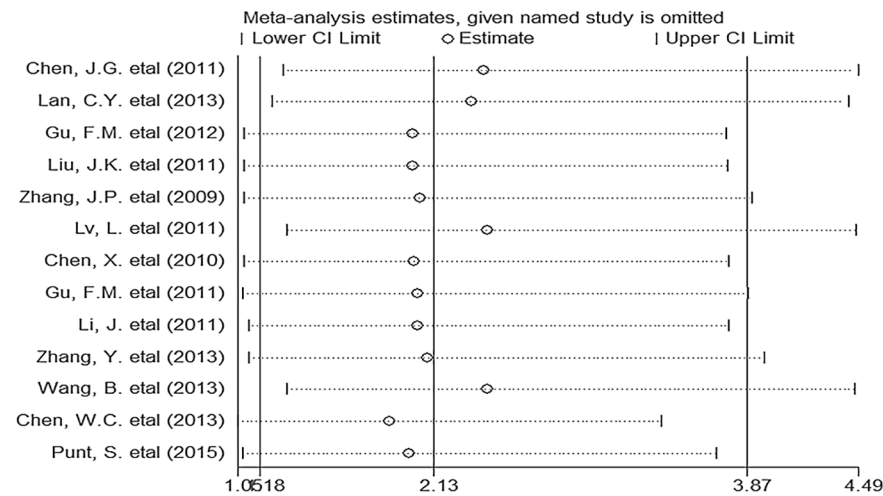

Supplementary Figure 3: Plots describing the influence of individual studies on the OR for OS at 1-year, 3-year, 5-year.

## Supplementary Table 1: Characteristics of the included studies for OR analysis of clinicopathological features

| Study                 | Year | Tumor type                      | No. of Patients | Cut off for high expression         | IL-17A High expression (%) | T category (T1+T2 / T3+T4) | N category (Positive / Negative) | M category (M0/M1)   | Tumor stage | I + II / III + IV       | Tumor Differentiation (Well-moderate/poor) |
|-----------------------|------|---------------------------------|-----------------|-------------------------------------|----------------------------|----------------------------|----------------------------------|----------------------|-------------|-------------------------|--------------------------------------------|
| Chen WC, et al. [35]  | 2013 | Breast cancer                   | 207             | positive cells > 90/HPF             | 37 (17.9)                  | H: (23/14); L: (127/43)    | H: (11/26); L: (74/96)           | NR                   | I-III       | H: (23/14); L: (114/56) | H:(24/13); L: (121/49)                     |
| Chen X, et al. [21]   | 2010 | Non-small cell lung cancer      | 52              | positive cells >5%/HPF              | 25 (48.1)                  | NR                         | NR                               | NR                   | I-III       | H: (12/13); L: (21/6)   | H:(3/22); L: (7/20)                        |
| Chen JG, et al. [25]  | 2011 | Gastric cancer                  | 192             | density of positive cells > 2.5/HPF | 100 (52.1)                 | H: (21/79); L: (20/72)     | H: (72/28); L: (69/23)           | NR                   | I-IV        | H: (58/42); L: (65/37)  | H:(25/75); L: (21/71)                      |
| Liu JK, et al. [29]   | 2011 | Colorectal cancer               | 52              | positive cells > 5%                 | 26 (50.0)                  | NR                         | NR                               | NR                   | III         | NR                      | H:(16/10); L: (18/8)                       |
| Zhang GQ, et al. [35] | 2012 | Non-small cell lung cancer      | 102             | intensity of staining               | 71 (69.6)                  | NR                         | NR                               | NR                   | I-III       | H: (44/28); L: (25/5)   | H:(44/30); L: (15/13)                      |
| Lin Y, et al. [23]    | 2014 | Colorectal cancer               | 78              | score $\geq$ 3                      | 67 (85.9)                  | NR                         | H: (39/28); L: (8/3)             | H: (49/18); L: (6/5) | I-IV        | H: (28/39); L: (1/10)   | H:(52/4); L: (4/4)                         |
| Gu FM, et al. [32]    | 2011 | Hepatocellular carcinoma        | 323             | density of positive cells           | 162 (50.2)                 | NR                         | NR                               | NR                   | I-III       | NR                      | H:(126/36);L: (129/32)                     |
| Zhang Y, et al. [33]  | 2013 | Gallbladder carcinoma           | 104             | positive cells/HPF                  | 54 (51.9)                  | H:(18/36); L:(24/26)       | H:(12/42); L:(4/46)              | H: (47/7); L: (45/5) | I-IV        | H: (16/38); L: (26/24)  | H:(35/19); L: (35/15)                      |
| Wang B, et al. [24]   | 2013 | Esophageal squamous cell cancer | 215             | density of positive cells > 10%     | 106 (49.3)                 | H:(49/57); L:(31/76)       | H:(41/65); L:(56/53)             | NR                   | I-IV        | NR                      | H:(81/25); L: (83/26)                      |

T: primary tumor; N: lymph node; M: metastasis; H: high; L: low; NR: not reported; HPF: high-power field.

## Supplementary Table 2: Specific criteria of Newcastle-Ottawa Scale (NOS)

|                                                                                                                                                                                                                                                                                                                                                                                                                                                                                                                                                                                                                                                                                                                                                                                                                                                                                                                                                                                                                                                                                                                                   |
|-----------------------------------------------------------------------------------------------------------------------------------------------------------------------------------------------------------------------------------------------------------------------------------------------------------------------------------------------------------------------------------------------------------------------------------------------------------------------------------------------------------------------------------------------------------------------------------------------------------------------------------------------------------------------------------------------------------------------------------------------------------------------------------------------------------------------------------------------------------------------------------------------------------------------------------------------------------------------------------------------------------------------------------------------------------------------------------------------------------------------------------|
| <p><b>NOTE:</b> Identify 'high' quality choices with a 'star' (one 'star' means 1 score ); A maximum of one 'star' for each item within the '<i>Selection</i>' and '<i>Outcome</i>' categories; maximum of two 'stars' for '<i>Comparability</i>'. Using the tool, each study is judged on eight items, categorized into three groups: the 'selection' of the study groups; the 'comparability' of the groups; and the ascertainment of the outcome of interest for cohort studies. Stars awarded for each quality item serve as a quick visual assessment. Stars are awarded such that the highest quality studies are awarded up to nine stars.</p>                                                                                                                                                                                                                                                                                                                                                                                                                                                                             |
| <p><b>1, Selection (4)</b></p> <p>(1), <u>Representativeness of the exposed cohort</u></p> <ul style="list-style-type: none"> <li>a) truly representative of the average ____ (describe) in the community ★</li> <li>b) somewhat representative of the average ____ in the community ★</li> <li>c) selected group of users eg nurses, volunteers</li> <li>d) no description of the derivation of the cohort</li> </ul> <p>(2), <u>Selection of the non exposed cohort</u></p> <ul style="list-style-type: none"> <li>a) drawn from the same community as the exposed cohort ★</li> <li>b) drawn from a different source</li> <li>c) no description of the derivation of the non exposed cohort</li> </ul> <p>(3), <u>Ascertainment of exposure to implants</u></p> <ul style="list-style-type: none"> <li>a) secure record (eg surgical records) ★</li> <li>b) structured interview ★</li> <li>c) written self report</li> <li>d) no description</li> </ul> <p>(4), <u>Demonstration that outcome of interest was not present at start of study</u></p> <ul style="list-style-type: none"> <li>a) yes ★</li> <li>b) no</li> </ul> |
| <p><b>2, Comparability (1)</b></p> <p>(1), <u>Comparability of cohorts on the basis of the design or analysis</u></p> <ul style="list-style-type: none"> <li>a) study controls for ____ (select the most important factor) ★</li> <li>b) study controls for any additional factor (This criteria could be modified to indicate specific control for a second important factor.) ★</li> </ul>                                                                                                                                                                                                                                                                                                                                                                                                                                                                                                                                                                                                                                                                                                                                      |
| <p><b>3, Outcome (3)</b></p> <p>(1), <u>Assessment of outcome</u></p> <ul style="list-style-type: none"> <li>a) independent blind assessment ★</li> <li>b) record linkage ★</li> <li>c) self report</li> <li>d) no description</li> </ul> <p>(2), <u>Was follow up long enough for outcomes to occur</u></p> <ul style="list-style-type: none"> <li>a) yes (select an adequate follow up period for outcome of interest) ★</li> <li>b) no</li> </ul> <p>(3), <u>Adequacy of follow up of cohorts</u></p> <ul style="list-style-type: none"> <li>a) complete follow up - all subjects accounted for ★</li> <li>b) subjects lost to follow up unlikely to introduce bias - small number lost - &gt; ____ % (select an adequate %) follow up, or description of those lost) ★</li> <li>c) follow up rate &lt; ____ % (select an adequate %) and no description of those lost</li> <li>d) no statement</li> </ul>                                                                                                                                                                                                                     |

**Supplementary Table 3: Study quality assessment according to the Newcastle–Ottawa Scale (NOS)**

| Study                   | Year | Selection |     |     |     | Comparability |         | Outcome |     |     | Quality Score (NOS) |
|-------------------------|------|-----------|-----|-----|-----|---------------|---------|---------|-----|-----|---------------------|
|                         |      | (1)       | (2) | (3) | (4) | (1) - a       | (1) - b | (1)     | (2) | (3) |                     |
| Chen WC, et al. [35]    | 2013 | Yes       | Yes | Yes | Yes | No            | Yes     | Yes     | Yes | Yes | 8                   |
| Chen X, et al. [21]     | 2010 | Yes       | Yes | Yes | Yes | No            | Yes     | Yes     | Yes | No  | 7                   |
| Chen JG, et al. [25]    | 2011 | Yes       | Yes | Yes | Yes | Yes           | No      | Yes     | Yes | Yes | 8                   |
| Cui XL, et al. [26]     | 2013 | Yes       | Yes | Yes | No  | Yes           | Yes     | Yes     | No  | Yes | 7                   |
| Gu FM, et al. [28]      | 2012 | Yes       | Yes | Yes | No  | Yes           | Yes     | Yes     | No  | Yes | 7                   |
| Lan CY, et al. [27]     | 2013 | Yes       | Yes | Yes | Yes | Yes           | Yes     | Yes     | Yes | No  | 8                   |
| Liao R, et al. [18]     | 2013 | Yes       | Yes | Yes | Yes | Yes           | Yes     | Yes     | No  | No  | 7                   |
| Liu JK, et al. [29]     | 2011 | Yes       | Yes | Yes | No  | Yes           | Yes     | Yes     | No  | Yes | 7                   |
| Lv L, et al. [22]       | 2011 | Yes       | Yes | Yes | Yes | Yes           | Yes     | Yes     | No  | Yes | 8                   |
| Zhang JP, et al. [19]   | 2009 | Yes       | Yes | No  | Yes | Yes           | Yes     | Yes     | Yes | No  | 7                   |
| Zhang GQ, et al. [30]   | 2012 | Yes       | Yes | Yes | No  | Yes           | No      | Yes     | Yes | Yes | 7                   |
| Lin Y, et al. [23]      | 2014 | Yes       | Yes | Yes | Yes | Yes           | No      | Yes     | Yes | Yes | 8                   |
| Liu XS, et al. [31]     | 2014 | Yes       | Yes | Yes | Yes | Yes           | No      | Yes     | Yes | Yes | 8                   |
| Gu FM, et al. [32]      | 2011 | Yes       | Yes | Yes | Yes | No            | No      | Yes     | Yes | Yes | 7                   |
| Li J, et al. [20]       | 2011 | Yes       | Yes | Yes | No  | Yes           | No      | Yes     | Yes | Yes | 7                   |
| Punt S, et al. [36]     | 2015 | Yes       | Yes | Yes | Yes | No            | No      | Yes     | Yes | Yes | 7                   |
| Zhang Y, et al. [33]    | 2013 | Yes       | Yes | Yes | Yes | No            | No      | Yes     | Yes | Yes | 7                   |
| He SB, et al. [34]      | 2011 | Yes       | Yes | No  | Yes | No            | Yes     | Yes     | No  | Yes | 6                   |
| Wang B, et al. [24]     | 2013 | Yes       | Yes | No  | Yes | Yes           | No      | Yes     | Yes | Yes | 7                   |
| Yu Q, et al. [37]       | 2014 | Yes       | Yes | Yes | No  | No            | No      | Yes     | Yes | Yes | 6                   |
| Tosolini M, et al. [38] | 2011 | Yes       | Yes | Yes | No  | No            | No      | Yes     | Yes | Yes | 6                   |
